# Supplementary material for: Long-range transport of anthropogenic air pollutants into the marine air: insight into fine particle transport and chloride depletion on sea salts
Source: Copernicus journal article supplement (doi:10.5194/acp-21-17715-2021), 2021-12-03
Supplement: Supplementary file 1 [file acp-21-17715-2021-supplement.pdf]

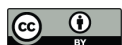

*Supplement of*

## **Long-range transport of anthropogenic air pollutants into the marine air: insight into fine particle transport and chloride depletion on sea salts**

**Liang Xu et al.**

*Correspondence to:* Weijun Li (liweijun@zju.edu.cn)

The copyright of individual parts of the supplement might differ from the article licence.

16 Table 1. Detailed information about sampling dates, times, and meteorological  
 17 conditions for samples.

| <b>ID</b> | <b>Date</b> | <b>Time</b>  | <b>Duration</b> | <b>RH</b> | <b>Wind speed</b> |
|-----------|-------------|--------------|-----------------|-----------|-------------------|
|           |             | (BJT, UTC+8) | (Second)        | (%)       | (m/s)             |
| 1         | 3/18        | 19:40        | 120             | 73.80     | 4.4               |
| 2         | 3/19        | 09:21        | 120             | 77.80     | 5.0               |
| 3         | 3/19        | 14:20        | 180             | 85.30     | 5.8               |
| 4         | 3/21        | 18:36        | 180             | 53.20     | 7.4               |
| 5         | 3/22        | 16:20        | 180             | 46.10     | 1.8               |
| 6         | 3/23        | 15:48        | 180             | 50.30     | 7                 |
| 7         | 3/24        | 10:36        | 180             | 44.50     | 3.2               |
| 8         | 3/24        | 15:27        | 180             | 41.10     | 3.1               |
| 9         | 3/26        | 21:02        | 180             | 59.90     | 1.7               |
| 10        | 4/10        | 09:20        | 180             | 71.20     | 8.2               |
| 11        | 4/13        | 14:52        | 180             | 51.70     | 1.6               |
| 12        | 4/15        | 11:52        | 180             | 40.60     | 5.6               |
| 13        | 4/17        | 15:13        | 180             | 64.14     | 2.1               |
| 14        | 4/18        | 15:02        | 180             | 73.60     | 6.3               |
| 15        | 4/19        | 15:56        | 180             | 69.50     | 4.2               |
| 16        | 4/21        | 07:59        | 180             | 54.90     | 1.5               |
| 17        | 4/21        | 10:43        | 180             | 71.00     | 16.4              |
| 18        | 4/21        | 15:06        | 180             | 75.40     | 13.7              |

|    |      |       |     |       |      |
|----|------|-------|-----|-------|------|
| 19 | 4/21 | 17:47 | 180 | 74.50 | 2.9  |
| 20 | 4/22 | 09:25 | 180 | 74.80 | 2.3  |
| 21 | 4/22 | 12:35 | 180 | 78.30 | 12.3 |
| 22 | 4/22 | 12:44 | 180 | 78.30 | 12.3 |

18

19

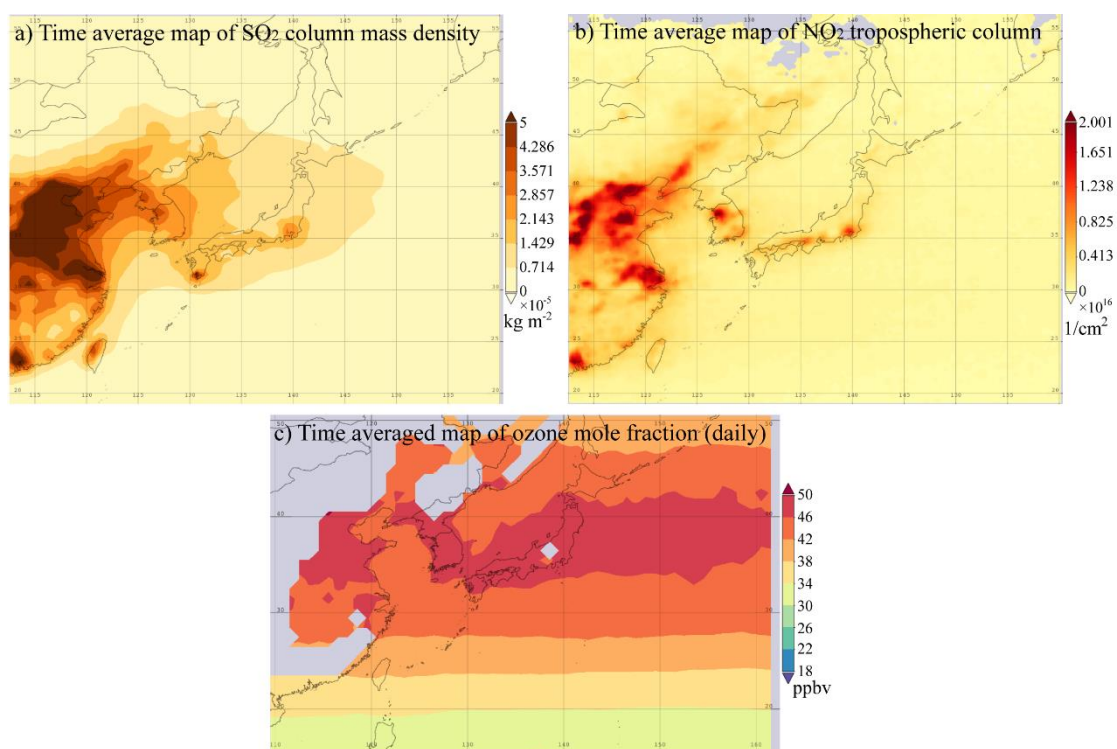

20

21 Figure S1. Time averaged map of SO<sub>2</sub> column mass density, NO<sub>2</sub> tropospheric column,  
 22 and O<sub>3</sub> mole fraction during our observation (17 March to 22 April 2014). The images  
 23 were downloaded from NASA Giovanni website  
 24 (<http://giovanni.gsfc.nasa.gov/giovanni>) (Acker and Leptoukh, 2007).

25

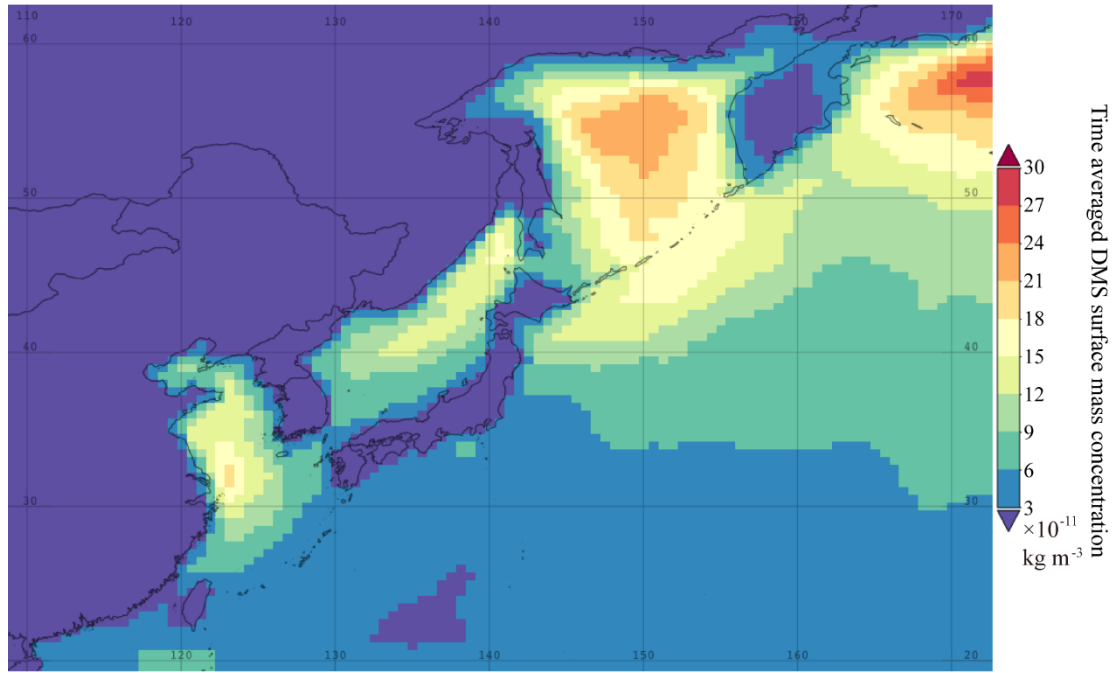

26

27 Figure S2. Time averaged map of dimethyl sulfide (DMS) surface mass concentration  
 28 over March to April 2014. The image was downloaded from NASA Giovanni website  
 29 (<http://giovanni.gsfc.nasa.gov/giovanni>) (Acker and Leptoukh, 2007).

30

31 **References**

32 Acker, J. G., and Leptoukh, G.: Online analysis enhances use of NASA Earth science data, Eos  
 33 Transactions, American Geophysical Union, 88, 14-17, <https://doi.org/10.1029/2007EO020003>,  
 34 2007.

35
